# Supplementary material for: Sharp bounds on sufficient-cause interactions under the assumption of no redundancy
Source: Springer Nature journal article supplement (doi:10.1186/s12874-017-0348-y), 2017-04-21
Supplement: MOESM1 [file 12239684]

**Additional file 1.** Derivations of the bounding formulas.

Let  $\text{Rate}^{\text{profile}=x_1, x_2}(t)$  denote the (instantaneous) disease rate at follow-up time  $t$ , for people in the population with profile  $= x_1, x_2$ . Let  $\text{Rate}_{\text{class}=c_1, c_2}(t)$  denote the (instantaneous) arrival rate in the study population for the unknown components for the class  $= c_1, c_2$  sufficient causes at follow-up time  $t$  (i.e., the completion rate for a class  $= c_1, c_2$  at the time  $t$ ). Under the no redundancy assumption, the disease rates and the completion rates are related through the following equations:

$$\text{Rate}^{\text{profile}=i, j}(t) = \text{Rate}_{\text{class}=*, *}(t) + \text{Rate}_{\text{class}=i, *}(t) + \text{Rate}_{\text{class}=*, j}(t) + \text{Rate}_{\text{class}=i, j}(t), \quad (\text{A1.1})$$

for  $i \in \{1, \dots, L_1\}$  and  $j \in \{1, \dots, L_2\}$ .

Let  $\text{Rate}_{\text{class}=int}(t)$  denote the rate of completion at a time  $t$  for any *interaction* class, and  $\text{Rate}_{\text{class}=any}(t)$ , the rate of completion at a time  $t$  for *any* class (all-unknown, main-effect, or interaction).

Under the no redundancy assumption, we have that

$$\text{Rate}_{\text{class}=int}(t) = \sum_{i=1}^{L_1} \sum_{j=1}^{L_2} \text{Rate}_{\text{class}=i, j}(t) \quad (\text{A1.2})$$

and

$$\text{Rate}_{\text{class}=any}(t) = \text{Rate}_{\text{class}=*, *}(t) + \sum_{i=1}^{L_1} \text{Rate}_{\text{class}=i, *}(t) + \sum_{j=1}^{L_2} \text{Rate}_{\text{class}=*, j}(t) + \text{Rate}_{\text{class}=int}(t). \quad (\text{A1.3})$$

The following derivations make frequent use of the peril index (PLoS ONE 2013;8: e67424). A ‘peril’ is identically a cumulative rate exponentiated, the reciprocal of a cumulative risk complement, and a one plus a cumulative odds, that is,

$$\text{Peril} = \exp\left[\int_0^T \text{Rate}(t) \times dt\right] = (1 - \text{Risk})^{-1} = 1 + \text{Odds}, \quad (\text{A1.4})$$

and is an index no less than 1.

The cumulative completion risk over  $(0, T)$  for a specific class  $= i, j$  sufficient-cause interaction is

$$\text{Risk}_{\text{class}=i,j} = 1 - \text{Peril}_{\text{class}=i,j}^{-1} = 1 - \exp\left[-\int_0^T \text{Rate}_{\text{class}=i,j}(t)dt\right], \quad (\text{A1.5})$$

for  $i \in \{1, \dots, L_1\}$  and  $j \in \{1, \dots, L_2\}$ . The cumulative completion risk over  $(0, T)$  for the global

sufficient-cause interaction is

$$\text{Risk}_{\text{class=int}} = 1 - \text{Peril}_{\text{class=int}}^{-1} = 1 - \exp\left[-\int_0^T \text{Rate}_{\text{class=int}}(t)dt\right]. \quad (\text{A1.6})$$

The cumulative completion risk over  $(0, T)$  for any class is

$$\text{Risk}_{\text{class=any}} = 1 - \text{Peril}_{\text{class=any}}^{-1} = 1 - \exp\left[-\int_0^T \text{Rate}_{\text{class=any}}(t)dt\right]. \quad (\text{A1.7})$$

To set a lower bound on  $\text{Risk}_{\text{class}=i,j}$  ( $i \in \{1, \dots, L_1\}, j \in \{1, \dots, L_2\}$ ), we first establish the following

inequalities from (A1.1):

$$\begin{aligned} \text{Peril}_{\text{class}=i,j} &= \exp\left[\int_0^T \text{Rate}_{\text{class}=i,j}(t)dt\right] \\ &\geq \exp\left[\int_0^T \left[\text{Rate}^{\text{profile}=i,j}(t) - \text{Rate}^{\text{profile}=i',j}(t) - \text{Rate}^{\text{profile}=i,j'}(t)\right]dt\right] \\ &= \frac{\exp\left[\int_0^T \text{Rate}^{\text{profile}=i,j}(t)dt\right]}{\exp\left[\int_0^T \text{Rate}^{\text{profile}=i',j}(t)dt\right] \times \exp\left[\int_0^T \text{Rate}^{\text{profile}=i,j'}(t)dt\right]} \\ &= \frac{\text{Peril}^{\text{profile}=i,j}}{\text{Peril}^{\text{profile}=i',j} \times \text{Peril}^{\text{profile}=i,j'}}, \end{aligned} \quad (\text{A1.8})$$

for any  $(i' \neq i) \in \{1, \dots, L_1\}$  and  $(j' \neq j) \in \{1, \dots, L_2\}$ . Therefore

$$\begin{aligned} \text{Risk}_{\text{class}=i,j}^{\text{LB}} &= 1 - \max_{\substack{(i' \neq i) \in \{1, \dots, L_1\} \\ (j' \neq j) \in \{1, \dots, L_2\}}}^{-1} \left\{ \frac{\text{Peril}^{\text{profile}=i,j}}{\text{Peril}^{\text{profile}=i',j} \times \text{Peril}^{\text{profile}=i,j'}}, 1 \right\} \\ &= 1 - \min_{\substack{(i' \neq i) \in \{1, \dots, L_1\} \\ (j' \neq j) \in \{1, \dots, L_2\}}} \left\{ \frac{1 - \text{Risk}^{\text{profile}=i,j}}{(1 - \text{Risk}^{\text{profile}=i',j}) \times (1 - \text{Risk}^{\text{profile}=i,j'})}, 1 \right\}. \end{aligned} \quad (\text{A1.9})$$

To set an upper bound on  $\text{Risk}_{\text{class}=i,j}$  ( $i \in \{1, \dots, L_1\}, j \in \{1, \dots, L_2\}$ ), Again from (A1.1), we have

$$\text{Rate}_{\text{class}=i,j}(t) \leq \text{Rate}^{\text{profile}=i,j}(t) \quad (\text{A1.10})$$

for all  $t$  in  $(0, T)$ , which implies  $\text{Peril}_{\text{class}=i,j} \leq \text{Peril}^{\text{profile}=i,j}$ . Therefore

$$\text{Risk}_{\text{class}=i,j}^{\text{UB}} = \text{Risk}^{\text{profile}=i,j}. \quad (\text{A1.11})$$

To set a lower bound on  $\text{Risk}_{\text{class=int}}$ , we first establish the following inequalities with the use of contrast coefficients described in the text. Again from (A1.1), we have

$$\begin{aligned} \text{Peril}_{\text{class=int}} &= \exp \left\{ \int_0^T \left[ \sum_{i=1}^{L_1} \sum_{j=1}^{L_2} \text{Rate}_{\text{class}=i,j}(t) \right] dt \right\} \\ &\geq \exp \left\{ \int_0^T \left[ \sum_{i=1}^{L_1} \sum_{j=1}^{L_2} u_i \times v_j \times \text{Rate}_{\text{class}=i,j}(t) \right] dt \right\} \\ &= \exp \left\{ \int_0^T \left[ \sum_{i=1}^{L_1} \sum_{j=1}^{L_2} u_i \times v_j \times \text{Rate}^{\text{profile}=i,j}(t) \right] dt \right\} \\ &= \prod_{i=1}^{L_1} \prod_{j=1}^{L_2} (\text{Peril}^{\text{profile}=i,j})^{u_i \times v_j}, \end{aligned} \quad (\text{A1.12})$$

for any legitimate contrast coefficients  $(u_1, \dots, u_{L_1})$  and  $(v_1, \dots, v_{L_2})$ . Therefore,

$$\begin{aligned} \text{Risk}_{\text{class=int}}^{\text{LB}} &= 1 - \max_{\substack{\text{permutations of } (u_1, \dots, u_{L_1}) \\ \text{and permutations of } (v_1, \dots, v_{L_2})}}^{-1} \left\{ \prod_{i=1}^{L_1} \prod_{j=1}^{L_2} (\text{Peril}^{\text{profile}=i,j})^{u_i \times v_j}, 1 \right\} \\ &= 1 - \min_{\substack{\text{permutations of } (u_1, \dots, u_{L_1}) \\ \text{and permutations of } (v_1, \dots, v_{L_2})}} \left\{ \prod_{i=1}^{L_1} \prod_{j=1}^{L_2} (1 - \text{Risk}^{\text{profile}=i,j})^{u_i \times v_j}, 1 \right\}. \end{aligned} \quad (\text{A1.13})$$

To set an upper bound on  $\text{Risk}_{\text{class=int}}$ , from (A1.1)~(A1.3) we have

$$\text{Rate}_{\text{class=int}}(t) \leq \text{Rate}_{\text{class=any}}(t) \leq \sum_{i=1}^{L_1} \sum_{j=1}^{L_2} \text{Rate}^{\text{profile}=i,j}(t) \quad (\text{A1.14})$$

for all  $t$  in  $(0, T)$ , which implies  $\text{Peril}_{\text{class=int}} \leq \text{Peril}_{\text{class=any}} \leq \prod_{i=1}^{L_1} \prod_{j=1}^{L_2} \text{Peril}^{\text{profile}=i,j}$ . Therefore

$$\text{Risk}_{\text{class=int}}^{\text{UB}} = 1 - \left( \prod_{i=1}^{L_1} \prod_{j=1}^{L_2} \text{Peril}^{\text{profile}=i,j} \right)^{-1} = 1 - \prod_{i=1}^{L_1} \prod_{j=1}^{L_2} (1 - \text{Risk}^{\text{profile}=i,j}). \quad (\text{A1.15})$$

Finally, the bounds on the relative prevalence of sufficient-cause interactions are functions of the above bounds on the cumulative completion risks, as presented in the text.
