# Supplementary material for: Sharp bounds on sufficient-cause interactions under the assumption of no redundancy
Source: Springer Nature journal article supplement (doi:10.1186/s12874-017-0348-y), 2017-04-21
Supplement: MOESM2 [file 12239684]

## Additional file 2. R code.

```
#####  
#                                                                 #  
# Arguments for the function, bounds.cohort:                       #  
#   case: the numbers of cases, a matrix                          #  
#   population: the numbers of populations, a matrix              #  
#   bootstrap: the total number of bootstrapping, a scalar      #  
#                 (default=10000)                                #  
#                                                                 #  
#                                                                 #  
# Arguments for the function, bounds.cscn:                         #  
#   case: the numbers of cases, a matrix                          #  
#   control: the numbers of controls, a matrix                   #  
#   bootstrap: the total number of bootstrapping, a scalar      #  
#                 (default=10000)                                #  
#                                                                 #  
#####  
bounds.cohort=function(case, population, bootstrap=10000){  
  L1=nrow(case)  
  half=floor(L1/2)  
  double=half*2  
  small=2^half -1  
  large=2^double - 2^half  
  u={}  
  for (i in small:large){  
    bits=as.integer( intToBits(i)[1:double])  
    if (sum(bits)==half) u=rbind(u,2*bits-1)  
  }  
  if (double != L1){  
    plate=u  
    u=cbind(0,plate)  
    for (i in 1:(double-1)){  
      u=rbind(u,cbind(plate[,1:i],0,plate[, (i+1):double]))  
    }  
    u=rbind(u,cbind(plate,0))  
  }  
  perm.u=nrow(u)
```

```

L2=ncol(case)
half=floor(L2/2)
double=half*2
small=2^half -1
large=2^double - 2^half
v={}
for (i in small:large){
  bits=as.integer( intToBits(i)[1:double])
  if (sum(bits)==half) v=cbind(v,2*bits-1)
}
if (double != L2){
  plate=v
  v=rbind(0,plate)
  for (i in 1:(double-1)){
    v=cbind(v,rbind(plate[1:i,],0,plate[(i+1):double,]))
  }
  v=cbind(v,rbind(plate,0))
}
perm.v=ncol(v)
sum.case=sum(case)
sum.population=sum(population)
ave.risk=sum.case/sum.population
risk=case/population
risk1=1-risk
zero=1e-50
infinity=1e100
perm=matrix(1, nrow=perm.u, ncol=perm.v)
for (i2 in 1:perm.u){
  for (j2 in 1:perm.v){
    positive=1
    negative=1
    for (i in 1:L1){
      for (j in 1:L2){
        temp=u[i2,i]*v[j,j2]
        if (temp==1) positive=positive*risk1[i,j]
        if (temp==-1) negative=negative*risk1[i,j]
      }
    }
    perm[i2,j2]=(positive+zero)/(negative+zero)
  }
}

```

```

}}
mini=min(perm)
posi=which(perm==mini, arr.ind=TRUE)
minu=posi[1,1]
minv=posi[1,2]
u=u[minu,]
v=v[,minv]
Risk.int.LB=1-min(mini,1)
Risk.int.UB=1-prod(risk1)
RP.int.LB=ifelse(Risk.int.UB==0, 0, Risk.int.LB/Risk.int.UB)
Risk.ij.LB=matrix(nrow=L1, ncol=L2)
rowmin=matrix(nrow=L1, ncol=L2)
colmin=matrix(nrow=L1, ncol=L2)
for (i in 1:L1){
for (j in 1:L2){
temp=matrix(infinity, nrow=L1, ncol=L2)
for (i2 in 1:L1){
for (j2 in 1:L2){
if ((i2!=i)&(j2!=j)){
negative=risk1[i2,j]*risk1[i,j2]
temp[i2,j2]=(risk1[i,j]+zero)/(negative+zero)
}
}
}
}
mini=min(temp)
posi=which(temp==mini, arr.ind=TRUE)
rowmin[i,j]=posi[1,1]
colmin[i,j]=posi[1,2]
Risk.ij.LB[i,j]=1-min(mini,1)
}
}
RP.ij.LB=ifelse(risk==0, 0, Risk.ij.LB/risk)
case.b=matrix(nrow=L1, ncol=L2)
one=matrix(1,nrow=L1,ncol=L2)
Risk.int.LB.b=1:bootstrap
Risk.int.UB.b=1:bootstrap
L12=L1*L2
Risk.ij.LB.b=matrix(nrow=L12, ncol=bootstrap)
Risk.ij.UB.b=matrix(nrow=L12, ncol=bootstrap)
RP.ij.LB.b=matrix(nrow=L12, ncol=bootstrap)

```

```

for (simu in 1:bootstrap){
  case.b=rbinom(prob=risk, n=one, size=population)
  risk.b=case.b/population
  risk1.b=1-risk.b
  positive=1
  negative=1
  for (i in 1:L1){
  for (j in 1:L2){
    index=L2*(i-1)+j
    temp=u[i]*v[j]
    if (temp==1) positive=positive*risk1.b[i,j]
    if (temp==-1) negative=negative*risk1.b[i,j]
    neg_ij=risk1.b[rowmin[i,j],j]*risk1.b[i,colmin[i,j]]
    temp=(risk1.b[i,j]+zero)/(neg_ij+zero)
    Risk.ij.LB.b[index,simu]=1-min(temp,1)
    Risk.ij.UB.b[index,simu]=risk.b[i,j]
  }}
  temp=(positive+zero)/(negative+zero)
  Risk.int.LB.b[simu]=1-min(temp,1)
  Risk.int.UB.b[simu]=1-prod(risk1.b)
}
RP.int.LB.b=
  ifelse(Risk.int.UB.b==0, 0, Risk.int.LB.b / Risk.int.UB.b)
RP.ij.LB.b=
  ifelse(Risk.ij.UB.b==0, 0, Risk.ij.LB.b / Risk.ij.UB.b)
Risk.global=matrix(nrow=1, ncol=7)
colnames(Risk.global)=c(" CS", " POP", " RISK",
                        " 95%LCL", " LB",
                        " UB", " 95%UCL")
Risk.global[1,1]=sum.case
Risk.global[1,2]=sum.population
Risk.global[1,3]=ave.risk
Risk.global[1,4]=quantile(Risk.int.LB.b, prob=0.025)
Risk.global[1,5]=Risk.int.LB
Risk.global[1,6]=Risk.int.UB
Risk.global[1,7]=quantile(Risk.int.UB.b, prob=0.975)
RP.global=matrix(nrow=1, ncol=5)
colnames(RP.global)=c(" CS", " POP", " RISK",

```

```

                                "95%LCL", " LB")
RP.global[1,1]=sum.case
RP.global[1,2]=sum.population
RP.global[1,3]=ave.risk
RP.global[1,4]=quantile(RP.int.LB.b, prob=0.05)
RP.global[1,5]=RP.int.LB
  Risk.specific=matrix(nrow=L12, ncol=9)
colnames(Risk.specific)=c(" X1", " X2",
                           " CS", " POP", " RISK",
                           " 95%LCL", " LB",
                           " UB", " 95%UCL")
RP.specific=matrix(nrow=L12, ncol=7)
colnames(RP.specific)=c(" X1", " X2",
                        " CS", " POP", " RISK",
                        " 95%LCL", " LB")
for (i in 1:L1){
for (j in 1:L2){
  index=L2*(i-1)+j
  Risk.specific[index,1]=i
  Risk.specific[index,2]=j
  Risk.specific[index,3]=case[i,j]
  Risk.specific[index,4]=population[i,j]
  Risk.specific[index,5]=risk[i,j]
  Risk.specific[index,6]=quantile(Risk.ij.LB.b[index,],
                                  prob=0.025)
  Risk.specific[index,7]=Risk.ij.LB[i,j]
  Risk.specific[index,8]=risk[i,j]
  Risk.specific[index,9]=quantile(Risk.ij.UB.b[index,],
                                  prob=0.975)

  RP.specific[index,1]=i
  RP.specific[index,2]=j
  RP.specific[index,3]=case[i,j]
  RP.specific[index,4]=population[i,j]
  RP.specific[index,5]=risk[i,j]
  RP.specific[index,6]=quantile(RP.ij.LB.b[index,],
                                  prob=0.05)
  RP.specific[index,7]=RP.ij.LB[i,j]
}}

```

```

RESULTS=list(Risk.global=Risk.global,
             RP.global=RP.global,
             Risk.specific=Risk.specific,
             RP.specific=RP.specific)
return(RESULTS)
}

bounds.cscn=function(case, control, bootstrap=10000){
  L1=nrow(case)
  half=floor(L1/2)
  double=half*2
  small=2^half -1
  large=2^double - 2^half
  u={}
  for (i in small:large){
    bits=as.integer( intToBits(i)[1:double])
    if (sum(bits)==half) u=rbind(u,2*bits-1)
  }
  if (double != L1){
    plate=u
    u=cbind(0,plate)
    for (i in 1:(double-1)){
      u=rbind(u,cbind(plate[,1:i],0,plate[, (i+1):double]))
    }
    u=rbind(u,cbind(plate,0))
  }
  perm.u=nrow(u)
  L2=ncol(case)
  half=floor(L2/2)
  double=half*2
  small=2^half -1
  large=2^double - 2^half
  v={}
  for (i in small:large){
    bits=as.integer( intToBits(i)[1:double])
    if (sum(bits)==half) v=cbind(v,2*bits-1)
  }
  if (double != L2){

```

```

plate=v
v=rbind(0,plate)
for (i in 1:(double-1)){
  v=cbind(v,rbind(plate[1:i,],0,plate[(i+1):double,]))
}
v=cbind(v,rbind(plate,0))
}
perm.v=ncol(v)
infinity=1e50
impossible=-1e100
sum.case=sum(case)
sum.control=sum(control)
pop=case+control
risk=case/pop
odds=ifelse(control==0, infinity, case/control)
perm=matrix(1, nrow=perm.u, ncol=perm.v)
for (i2 in 1:perm.u){
for (j2 in 1:perm.v){
  positive=0
  negative=0
  for (i in 1:L1){
  for (j in 1:L2){
    temp=u[i2,i]*v[j,j2]
    if (temp==1) positive=positive+odds[i,j]
    if (temp==-1) negative=negative+odds[i,j]
  }}
  perm[i2,j2]=ifelse(positive>infinity, infinity, positive)-
    ifelse(negative>infinity, infinity, negative)
}}
maxi=max(perm)
posi=which(perm==maxi, arr.ind=TRUE)
maxu=posi[1,1]
maxv=posi[1,2]
u=u[maxu,]
v=v[,maxv]
all=sum(odds)
RP.int.LB=max(maxi,0) / ifelse(all>infinity, infinity, all)
RP.ij.LB=matrix(nrow=L1, ncol=L2)

```

```

rowmax=matrix(nrow=L1, ncol=L2)
colmax=matrix(nrow=L1, ncol=L2)
for (i in 1:L1){
for (j in 1:L2){
  temp=matrix(impossible, nrow=L1, ncol=L2)
  for (i2 in 1:L1){
  for (j2 in 1:L2){
    if ((i2!=i)&(j2!=j)){
      negative=odds[i2,j]+odds[i,j2]
      temp[i2,j2]=
        ifelse(odds[i,j]>infinity, infinity, odds[i,j])-
        ifelse(negative>infinity, infinity, negative)
    }
  }}
  maxi=max(temp)
  posi=which(temp==maxi, arr.ind=TRUE)
  rowmax[i,j]=posi[1,1]
  colmax[i,j]=posi[1,2]
  RP.ij.LB[i,j]=ifelse(odds[i,j]==0,0,max(maxi,0)/odds[i,j])
}}
case.b=matrix(nrow=L1, ncol=L2)
one=matrix(1,nrow=L1,ncol=L2)
RP.int.LB.b=1:bootstrap
L12=L1*L2
RP.ij.LB.b=matrix(nrow=L12, ncol=bootstrap)
for (simu in 1:bootstrap){
  case.b=rbinom(prob=risk, n=one, size=pop)
  control.b=pop-case.b
  odds.b=ifelse(control.b==0, infinity, case.b/control.b)
  positive=0
  negative=0
  for (i in 1:L1){
  for (j in 1:L2){
    index=L2*(i-1)+j
    temp=u[i]*v[j]
    if (temp==1) positive=positive+odds.b[i,j]
    if (temp==-1) negative=negative+odds.b[i,j]
    neg_ij=odds.b[rowmax[i,j],j] + odds.b[i,colmax[i,j]]
  }
}
}

```



```

        diff=ifelse(odds.b[i,j]>infinity, infinity, odds.b[i,j])-
            ifelse(neg_ij>infinity, infinity, neg_ij)
        RP.ij.LB.b[index,simu]=
            ifelse(odds.b[i,j]==0, 0, max(diff,0)/odds.b[i,j])
    }}
diff=ifelse(positive>infinity, infinity, positive)-
    ifelse(negative>infinity, infinity, negative)
all=sum(odds.b)
RP.int.LB.b[simu]=max(diff,0) /
    ifelse(all>infinity, infinity, all)
}
RP.global=matrix(nrow=1, ncol=5)
colnames(RP.global)=c(" CS", " CN", " ODDS",
    " 95%LCL", " LB")
RP.global[1,1]=sum.case
RP.global[1,2]=sum.control
RP.global[1,3]=sum.case/sum.control
RP.global[1,4]=quantile(RP.int.LB.b, prob=0.05)
RP.global[1,5]=RP.int.LB
RP.specific=matrix(nrow=L12, ncol=7)
colnames(RP.specific)=c(" X1", " X2",
    " CS", " CN", " ODDS",
    " 95%LCL", " LB")
for (i in 1:L1){
for (j in 1:L2){
    index=L2*(i-1)+j
    RP.specific[index,1]=i
    RP.specific[index,2]=j
    RP.specific[index,3]=case[i,j]
    RP.specific[index,4]=control[i,j]
    RP.specific[index,5]=odds[i,j]
    RP.specific[index,6]=quantile(RP.ij.LB.b[index,],
        prob=0.05)
    RP.specific[index,7]=RP.ij.LB[i,j]
}}
RESULTS=list(RP.global=RP.global, RP.specific=RP.specific)
return(RESULTS)
}

```

```

#####
# Example 1. A Cohort Study on Hypertension Risk      #
#####

example1.diseased=
  t(matrix( c(79,100,153,278), nrow=2))
example1.nondiseased=
  t(matrix( c(1731,581,1232,743), nrow=2))
example1.population=example1.diseased + example1.nondiseased
bounds.cohort( case= example1.diseased,
               population= example1.population )

#####
# Example 2. A Case-Control Study on Lung Cancer Risk  #
#####

example2.case=
  t(matrix( c(157,124,26,273,180,56,105,59,20), nrow=3))
example2.control=
  t(matrix(c(186,142,31,286,183,53,77,55,5), nrow=3))
bounds.cscn( case= example2.case,
              control= example2.control )

```
