# Supplementary material for: Sharp bounds on sufficient-cause interactions under the assumption of no redundancy
Source: Springer Nature journal article supplement (doi:10.1186/s12874-017-0348-y), 2017-04-21
Supplement: MOESM4 [file 12239684]

**Additional file 4.** A proof that the bounds are sharper than previous bounds.

For the lower bounds:

$$\begin{aligned}
\text{Risk}_{\text{class}=i,j}^{\text{LB}} &= 1 - \min_{\substack{(i' \neq i) \in \{1, \dots, L_1\} \\ (j' \neq j) \in \{1, \dots, L_2\}}} \left\{ \frac{1 - \text{Risk}^{\text{profile}=i,j}}{(1 - \text{Risk}^{\text{profile}=i',j}) \times (1 - \text{Risk}^{\text{profile}=i,j'})}, 1 \right\} \\
&= \max_{\substack{(i' \neq i) \in \{1, \dots, L_1\} \\ (j' \neq j) \in \{1, \dots, L_2\}}} \left\{ \frac{\text{Risk}^{\text{profile}=i,j} - \text{Risk}^{\text{profile}=i',j} - \text{Risk}^{\text{profile}=i,j'} + \text{Risk}^{\text{profile}=i',j} \times \text{Risk}^{\text{profile}=i,j'}}{(1 - \text{Risk}^{\text{profile}=i',j}) \times (1 - \text{Risk}^{\text{profile}=i,j'})}, 0 \right\} \\
&\geq \max_{\substack{(i' \neq i) \in \{1, \dots, L_1\} \\ (j' \neq j) \in \{1, \dots, L_2\}}} \left\{ \text{Risk}^{\text{profile}=i,j} - \text{Risk}^{\text{profile}=i',j} - \text{Risk}^{\text{profile}=i,j'}, 0 \right\} \\
&= \text{Sjölander et al.'s lower bound.}
\end{aligned}$$

For the upper bounds:

Sjölander et al. (21) also derived an assumption-free upper bound for the specific interaction:

$$\min \left\{ \text{Risk}^{\text{profile}=i,j}, \sum_{(i' \neq i) \in \{1, \dots, L_1\}} (1 - \text{Risk}^{\text{profile}=i',j}), \sum_{(j' \neq j) \in \{1, \dots, L_2\}} (1 - \text{Risk}^{\text{profile}=i,j'}) \right\}. \text{ However, this bound is}$$

wrongly too sharp. In fact, the cumulative completion risk of the class =  $i, j$  sufficient-cause

interaction is bounded above, neither by  $\sum_{(i' \neq i) \in \{1, \dots, L_1\}} (1 - \text{Risk}^{\text{profile}=i',j})$  nor by

$\sum_{(j' \neq j) \in \{1, \dots, L_2\}} (1 - \text{Risk}^{\text{profile}=i,j'})$ , as dictated by Sjölander et al (21). To see why, let us assume that all

the diseased subjects in a population are caused by and only by sufficient-cause interactions, that is,

all the profile =  $i, j$  diseased subjects had contracted the disease because of the completion of the

class =  $i, j$  sufficient-cause interaction, for all  $i \in \{1, \dots, L_1\}$  and all  $j \in \{1, \dots, L_2\}$ . Further, assume

that the follow-up is very long ( $T$  is very large) so that  $\text{Risk}^{\text{profile}=i,j} \approx 1$  for all  $i \in \{1, \dots, L_1\}$  and

all  $j \in \{1, \dots, L_2\}$ . Sjölander et al.'s upper bound (21) then becomes nearly zero. Clearly, it should

not be.
